# Supplementary material for: CoBRA: Containerized Bioinformatics Workflow for Reproducible ChIP/ATAC-seq Analysis
Source: PubMed Central journal article supplement (PMC9039557; doi:10.1016/j.gpb.2020.11.007), 2021-07-18
Supplement: mmc2.pdf [file mmc2.pdf]

# Overview of CoBRA layout

**A**

|                                                                                                 |                                    |
|-------------------------------------------------------------------------------------------------|------------------------------------|
|  metasheet.csv | Comma Separated Spreadsheet (.csv) |
|  config.yaml   | YAML                               |
|  Snakefile     | File                               |
|  README.md     | Markdown File                      |
|  scripts       | Directory                          |
|  ref_files     | Directory                          |
|  analysis      | Directory                          |

**B**

|                                                                                                                               |
|-------------------------------------------------------------------------------------------------------------------------------|
| ▼  analysis                                  |
| ▼  clustering_analysis                       |
| ▼  rpkm.1_num_sample.0_scale.q_fliter.cov.2  |
| ▼  plots                                     |
| ▼  images                                    |
|  heatmapSF_plot_2_percent                    |
|  heatmapSS_plot_2_percent                    |
|  pca_plot_2_percent                          |
|  read_counts                                 |
| ▶  rpkm.2_num_sample.3_scale.q_fliter.cov.2 |
| ▼  differential_peaks                      |
| ▼  Met_over_Tumor                          |
| ▼  GSEA                                    |
| ▶  C2_Curated.GseaPreranked.1587247351823  |
| ▶  H_Hallmark.GseaPreranked.1587247292750  |
|  cistrome_toolkit                          |
| ▼  logs                                    |
|  clean_bam                                 |
|  read_coutns                               |
|  remove_duplicates                         |
|  reorder                                   |
| ▼  preprocessed_files                      |
| ▼  bam                                     |
|  clean_bam                                 |
|  remove_chrMY                              |
|  remove_duplicates                         |
|  reorder                                   |
|  sorted_reads                              |
| ▶  bed                                     |
| ▶  bigwig                                  |
| ▶  read_counts                             |
