# Supplementary material for: CoBRA: Containerized Bioinformatics Workflow for Reproducible ChIP/ATAC-seq Analysis
Source: PubMed Central journal article supplement (PMC9039557; doi:10.1016/j.gpb.2020.11.007), 2021-07-18
Supplement: mmc3.pdf [file mmc3.pdf]

A

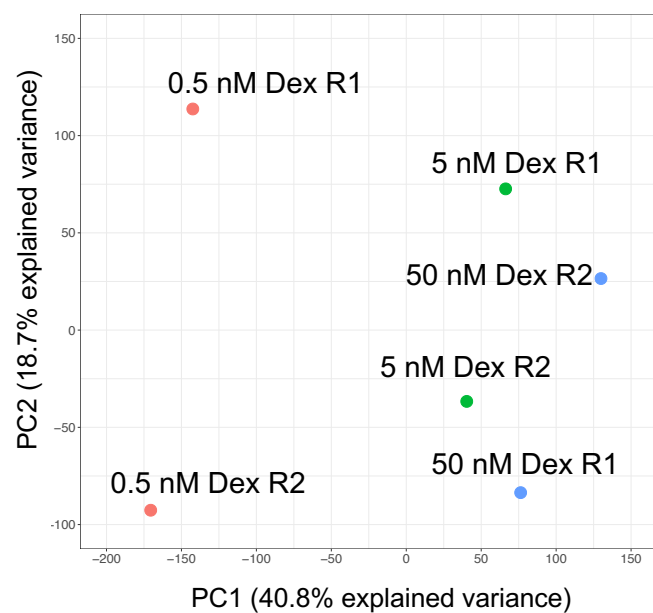

B

| Cluster | Motif | Name                                                     | P Value | Log <sub>10</sub> (P Value) | # Target sequences with motif | % of Target sequences with motif | # Background sequences with motif | % of Background sequences with motif |
|---------|-------|----------------------------------------------------------|---------|-----------------------------|-------------------------------|----------------------------------|-----------------------------------|--------------------------------------|
| 1       |       | GRE(NR)JR3RAW264.7-GRE-ChIP-Seq(Unpublished)/Homer       | 1e-2378 | -5477.435464                | 3019.0                        | 44.27%                           | 1521.0                            | 3.63%                                |
|         |       | GRE(NR)JR3A549-GR-ChIP-Seq(GSE32465)/Homer               | 1e-2142 | -4932.236126                | 2349.0                        | 34.44%                           | 824.5                             | 1.97%                                |
|         |       | ARE(NR)LNCAP-AR-ChIP-Seq(GSE27824)/Homer                 | 1e-2031 | -4677.025589                | 2876.0                        | 42.17%                           | 1742.3                            | 4.16%                                |
|         |       | PGR(NR)EndoStromal-PGR-ChIP-Seq(GSE69539)/Homer          | 1e-1835 | -4225.926702                | 2602.0                        | 38.15%                           | 1540.2                            | 3.67%                                |
|         |       | PR(NR)T47D-PR-ChIP-Seq(GSE31130)/Homer                   | 1e-1225 | -2820.686095                | 5632.0                        | 82.58%                           | 16086.6                           | 38.37%                               |
| 2       |       | Fra1(bZIP)/BT549-Fra1-ChIP-Seq(GSE46166)/Homer           | 1e-1129 | -2599.846466                | 2798.0                        | 41.03%                           | 3627.8                            | 8.65%                                |
|         |       | Fra2(bZIP)/Striatum-Fra2-ChIP-Seq(GSE43429)/Homer        | 1e-1093 | -2518.963525                | 2590.0                        | 37.98%                           | 3139.8                            | 7.49%                                |
|         |       | JunB(bZIP)/Dendritic-Cells-Junb-ChIP-Seq(GSE36099)/Homer | 1e-1040 | -2396.976282                | 2728.0                        | 40.00%                           | 3729.9                            | 8.90%                                |
|         |       | Aif3(bZIP)/GBM-ATF3-ChIP-Seq(GSE33912)/Homer             | 1e-1037 | -2389.268204                | 2975.0                        | 43.62%                           | 4536.5                            | 10.82%                               |
|         |       | BATF(bZIP)/Th17-BATF-ChIP-Seq(GSE39756)/Homer            | 1e-1027 | -2365.228649                | 2920.0                        | 42.82%                           | 4396.5                            | 10.49%                               |
|         |       | FosD2(bZIP)/3T3L1-FosD2-ChIP-Seq(GSE56872)/Homer         | 1e-1015 | -2338.547207                | 2128.0                        | 31.20%                           | 2151.7                            | 5.13%                                |
|         |       | AP-1(bZIP)/ThaoMac-PU.1-ChIP-Seq(GSE21512)/Homer         | 1e-950  | -2188.543174                | 3045.0                        | 44.65%                           | 5166.9                            | 12.32%                               |
|         |       | Jun-AP1(bZIP)/K562-cJun-ChIP-Seq(GSE31477)/Homer         | 1e-918  | -2115.098968                | 1762.0                        | 25.84%                           | 1544.5                            | 3.68%                                |
|         |       | Bach2(bZIP)/OCI.Ly7-Bach2-ChIP-Seq(GSE44420)/Homer       | 1e-493  | -1135.631294                | 1172.0                        | 17.18%                           | 1285.2                            | 3.07%                                |
|         |       | Bach1(bZIP)/K562-Bach1-ChIP-Seq(GSE31477)/Homer          | 1e-191  | -440.281436                 | 392.0                         | 5.75%                            | 343.5                             | 0.82%                                |
|         |       | NF-E2(bZIP)/K562-NFE2-ChIP-Seq(GSE31477)/Homer           | 1e-189  | -435.587020                 | 427.0                         | 6.26%                            | 422.3                             | 1.01%                                |
|         |       | Nrf2(bZIP)/Lymphoblast-Nrf2-ChIP-Seq(GSE37589)/Homer     | 1e-168  | -387.840346                 | 362.0                         | 5.31%                            | 336.6                             | 0.80%                                |
|         |       | NFE2L2(bZIP)/HepG2-NFE2L2-ChIP-Seq(Encode)/Homer         | 1e-141  | -325.917248                 | 322.0                         | 4.72%                            | 320.6                             | 0.76%                                |
|         |       | MafA(bZIP)/Tset-MafA-ChIP-Seq(GSE30298)/Homer            | 1e-76   | -175.974922                 | 1475.0                        | 21.63%                           | 5620.6                            | 13.41%                               |
